# Supplementary material
Source: Springer Nature journal article supplement (https://www.springermedizin.de/resource/supplementary/13058_2005_1349_MOESM9_ESM.pdf/9698916)
Supplement: MOESM9 [file 9698916]

# S-9: SNP and SMRT array Data Comparison

**A**

SMRT BAC aCGH

10K SNP Array

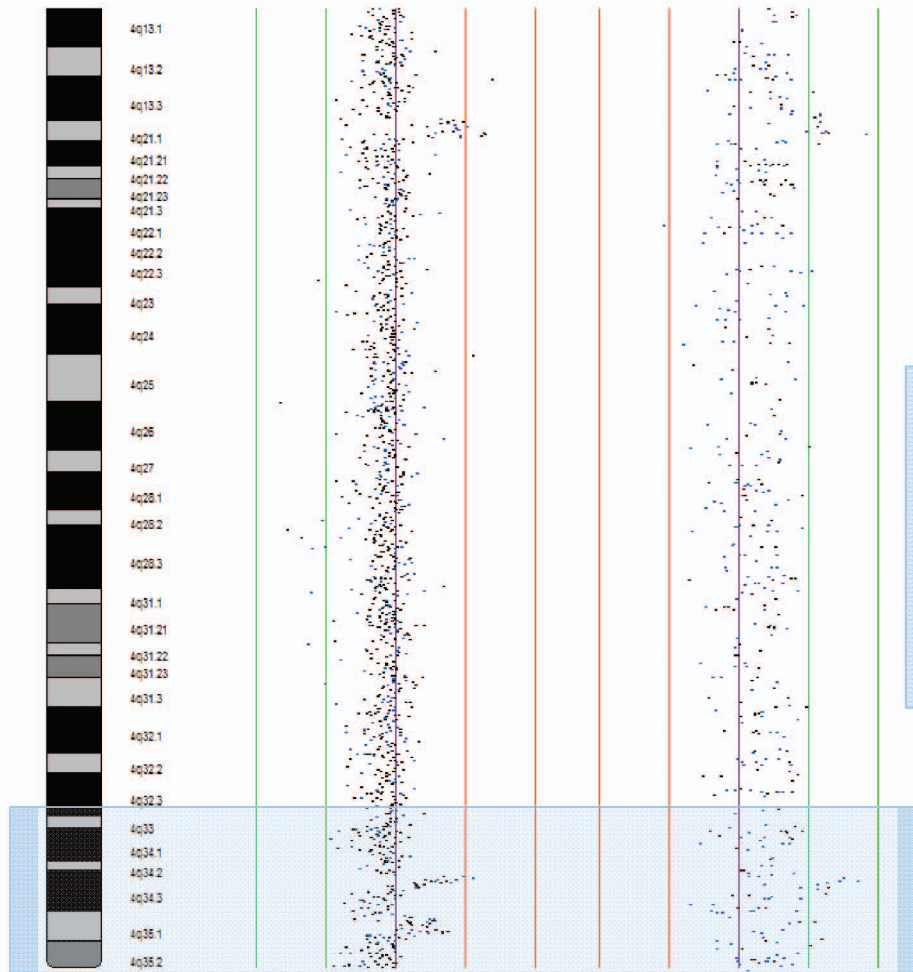

4q

**B**

SMRT BAC aCGH

10K SNP Array

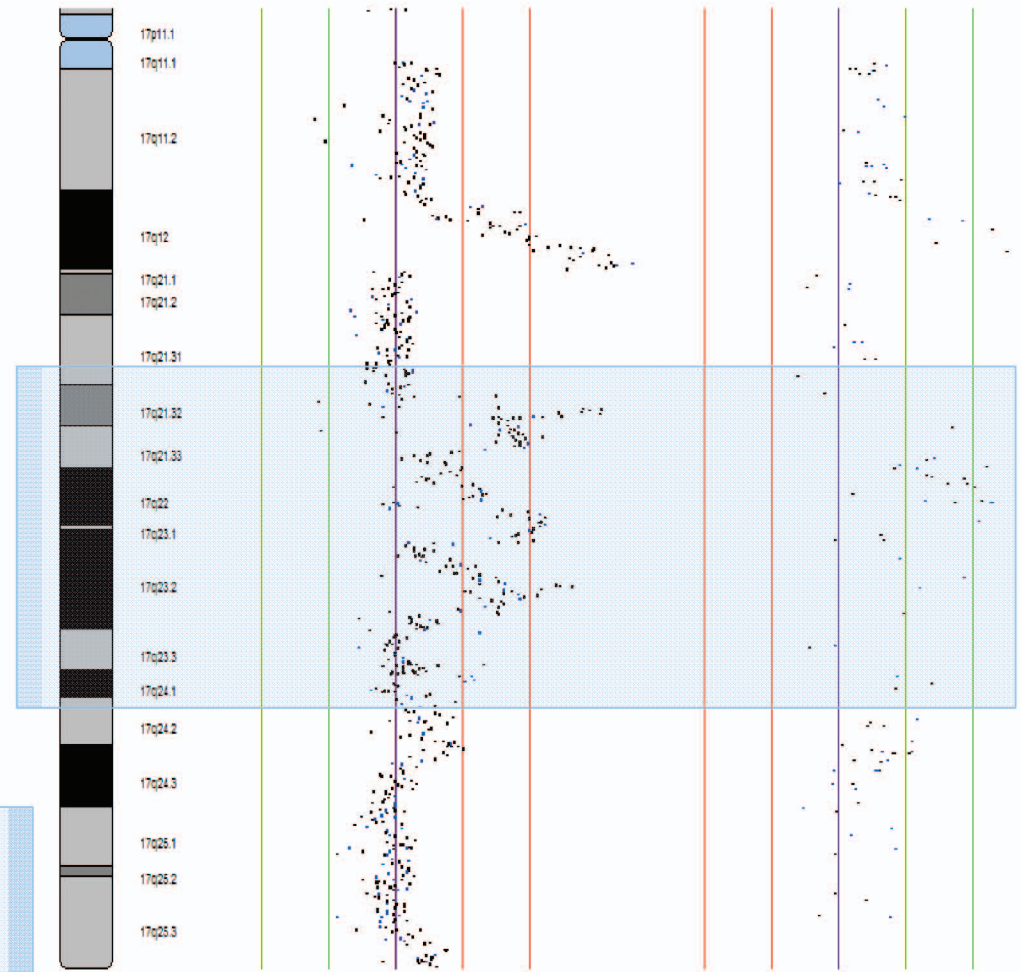

17q

SNP data from Zhao X. *et al* 2004
